# Supplementary material for: A unique binding mode of Nek2A to the APC/C allows its ubiquitination during prometaphase
Source: PubMed Central journal article supplement (PMC7271329; doi:10.15252/embr.201949831), 2020-04-19

**Figure 1**

**B**

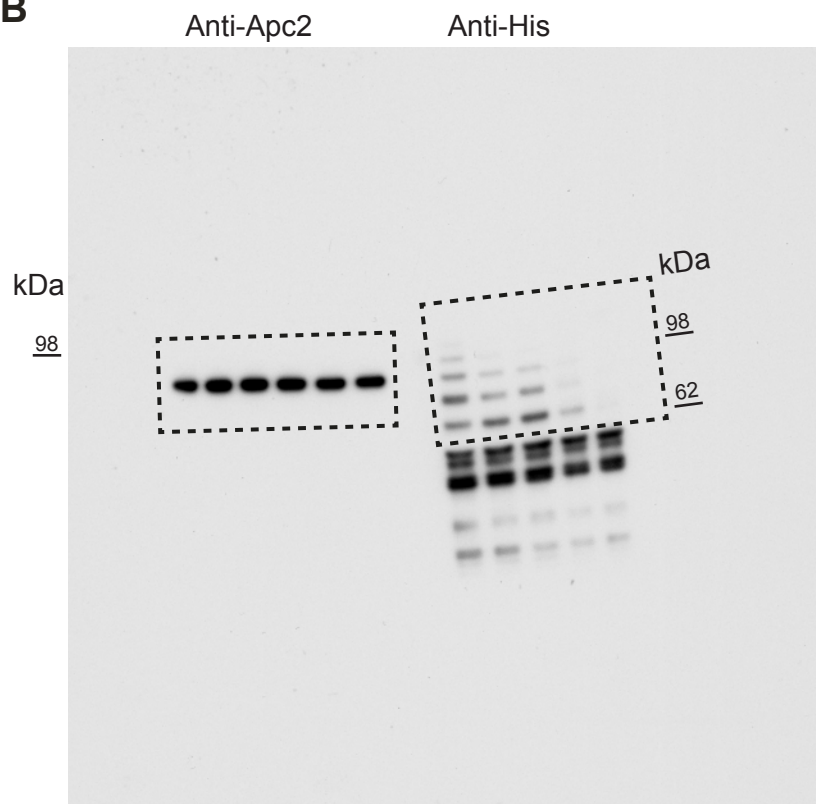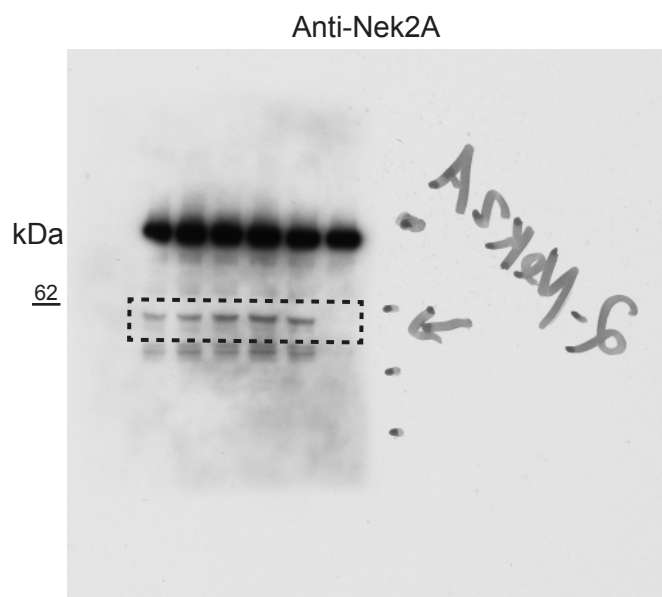

**C**

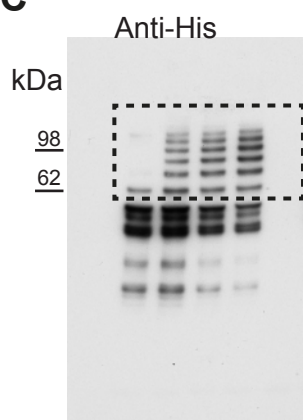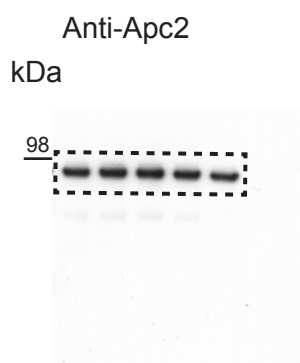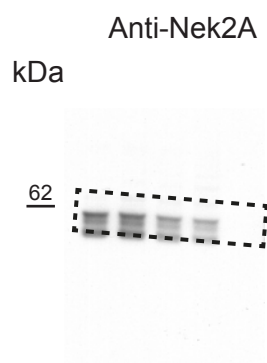

**Figure 1**

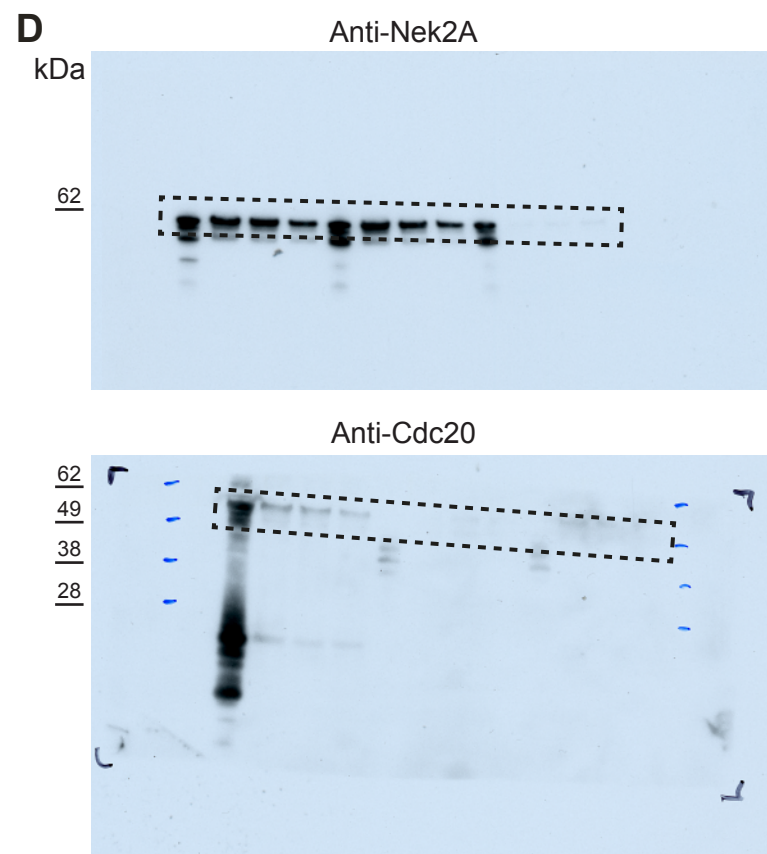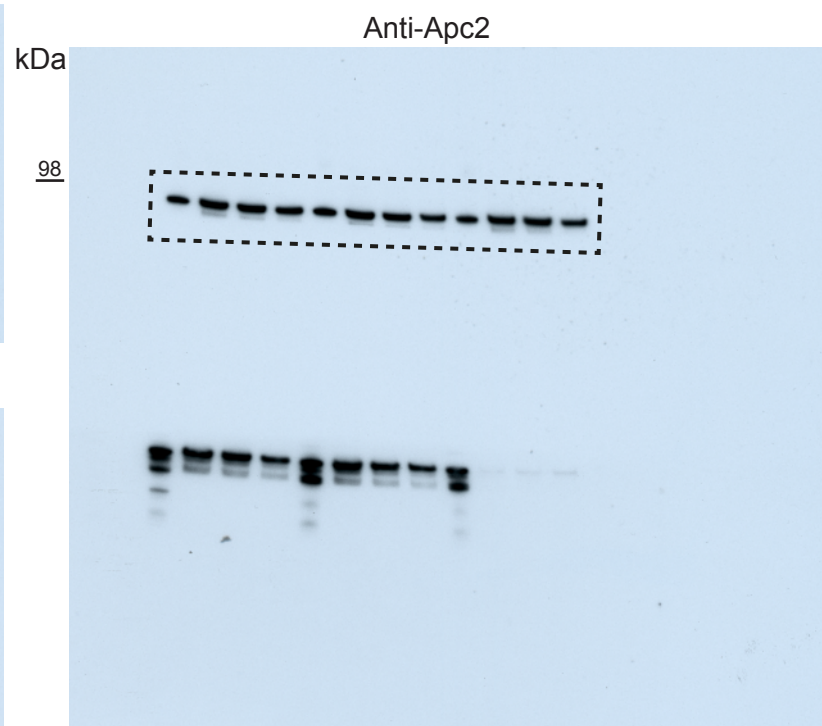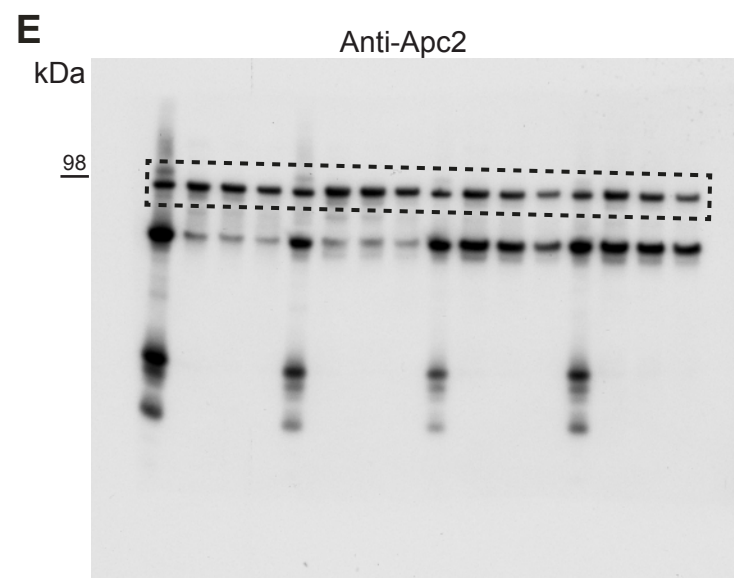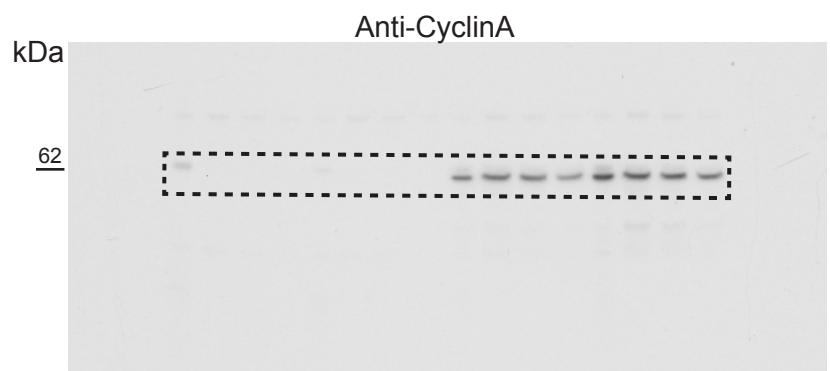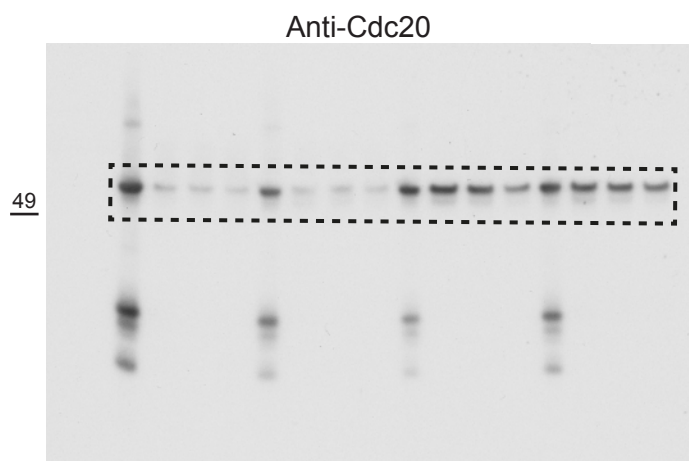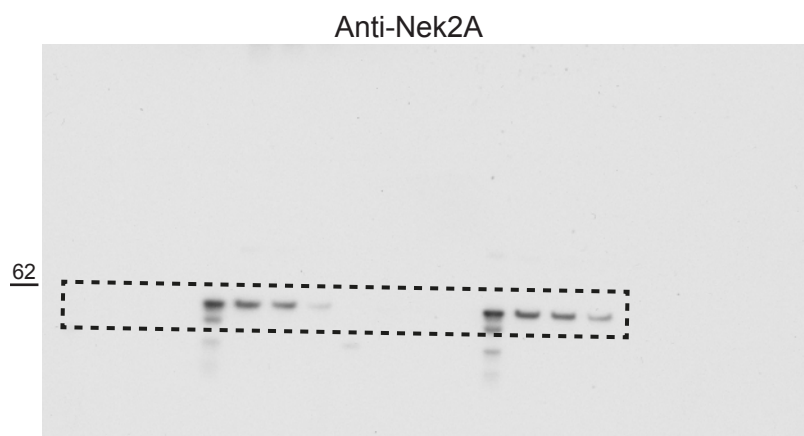

Supplement: EMBR-21-e49831-s013.pdf [file EMBR-21-e49831-s013.pdf]
